# Supplementary material for: How Should We Prepare Our Pharmacist Preceptors? Design, Development and Implementation of a Training Program in a Regional Australian University
Source: MDPI journal article supplement (doi:10.3390/pharmacy11050148), 2023-09-17

## Supplementary Materials

### JCU Pharmacy Preceptor Training - Program Outline

- ❖ Welcome to the program
- ❖ Module 1 – Program Overview and the preceptor as a ROLE MODEL
- ❖ Module 2 – The preceptor as an EDUCATOR
- ❖ Module 3 – The preceptor as an ASSESSOR
- ❖ Module 4 – The Preceptor as a MENTOR
- ❖ Preceptor online small group interactive NETWORKING SESSION
- ❖ Preceptor online discussion forum (optional)
- ❖ Post-training survey and Certificate of Completion

Table S1: Outline of JCU Online Preceptor Training Program

Figure S1: JCU Pharmacist Preceptor Training Hub Organizational Platform

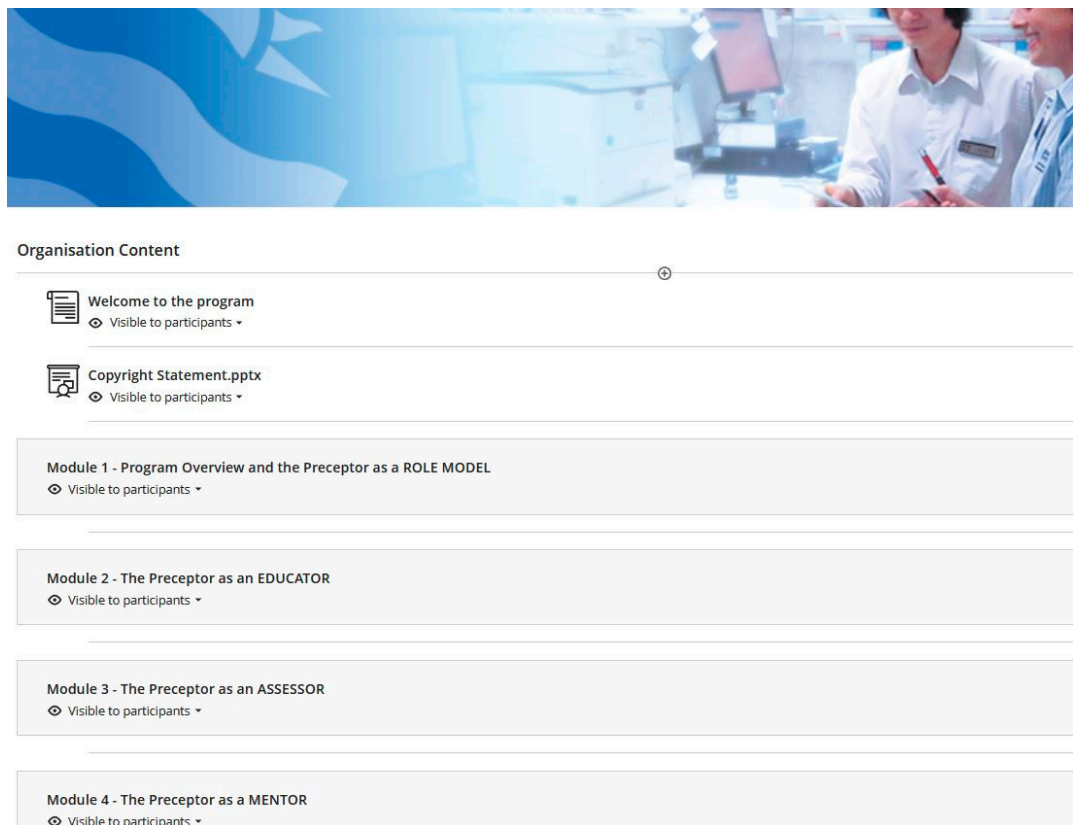

Supplement: s1 [file s1]
